# Supplementary material
Source: PubMed Central journal article supplement (PMC6902694)
Supplement: fj.201901436RR.sd1.pdf [file fj.201901436RR.sd1.pdf]

# Supplementary Information

## Fungi form interkingdom microbial communities in the human primordial gut that develop with gestational age

Willis et al.

### Supplemental Text

#### Bacterial colonization of the meconium

The bacterial colonization of first-pass meconium has been previously described<sup>3,20,21</sup>. Unlike previous work, both preterm and term-born newborns were equally likely to contain bacterial DNA on 16S rRNA sequencing at a read depth of 3000x (90% <33 weeks' and 94% >33 weeks' gestation,  $\chi^2 p = 0.5397$ ). Gestational age also did not alter the alpha diversity of meconium samples. The most marked alteration in the relative composition of bacteria at the order level was in Bacteroidia (1.3% < 33 weeks' and 10.6% > 33 weeks' gestation) and Alphaproteobacteria (0.08% <33 weeks and 8.3% >33 weeks' gestation). In general, with increasing gestational age the relative abundance of rarer bacterial orders increased, with the exception of order Bacilli which decreased from 26.9% in preterm infants to 17.6% in those born at term. Gestational age significantly altered the bacterial community structure (PERMANOVA of unweighted UniFrac distances with 999 permutations,  $f$ -statistic 4.65,  $p = 0.001$ ).

We also performed LeFSe to identify bacterial taxa that could function as high-dimensional biomarkers of gestational age. The abundance of multiple bacterial genera identified preterm samples, including *Dermacoccus*, *Parabacteroides*, *Clostridium*, *Oribacterium*, *Anaerococcus*, *Citrobacter*, *Enterobacter* and *Erwinia*. The abundance of two taxa identified full term samples: family *Micrococcaceae* and genus *Methylobacterium*.

The alpha diversity was not significantly altered by any perinatal factor analyzed. As with fungi, mode of delivery was not associated with changes in bacterial community structure (PERMANOVA,  $f$ -statistic 1.192,  $p = 0.19$ ). After antibiotic exposure, the relative abundance of order Gammaproteobacteria increased (46.8% without perinatal antibiotic exposure and 64.7% with exposure), while the relative abundance of order Bacilli decreased (27.8% without exposure and 14.4% with exposure). However, overall bacterial community structures were not significantly altered by perinatal antibiotic exposure (PERMANOVA,  $f$ -statistic 1.47,  $p = 0.052$ ). Far less prominent changes in relative abundance were noted by host sex, and no differences were appreciated in bacterial community structure (PERMANOVA,  $f$ -statistic 1.18,  $p = 0.179$ ). Finally, illness severity as quantified by the CRIB-II score was also not associated with significant differences in bacterial community structure (PERMANOVA,  $f$ -statistic 1.49,  $p = 0.051$ ).

# Supplementary Figure 1

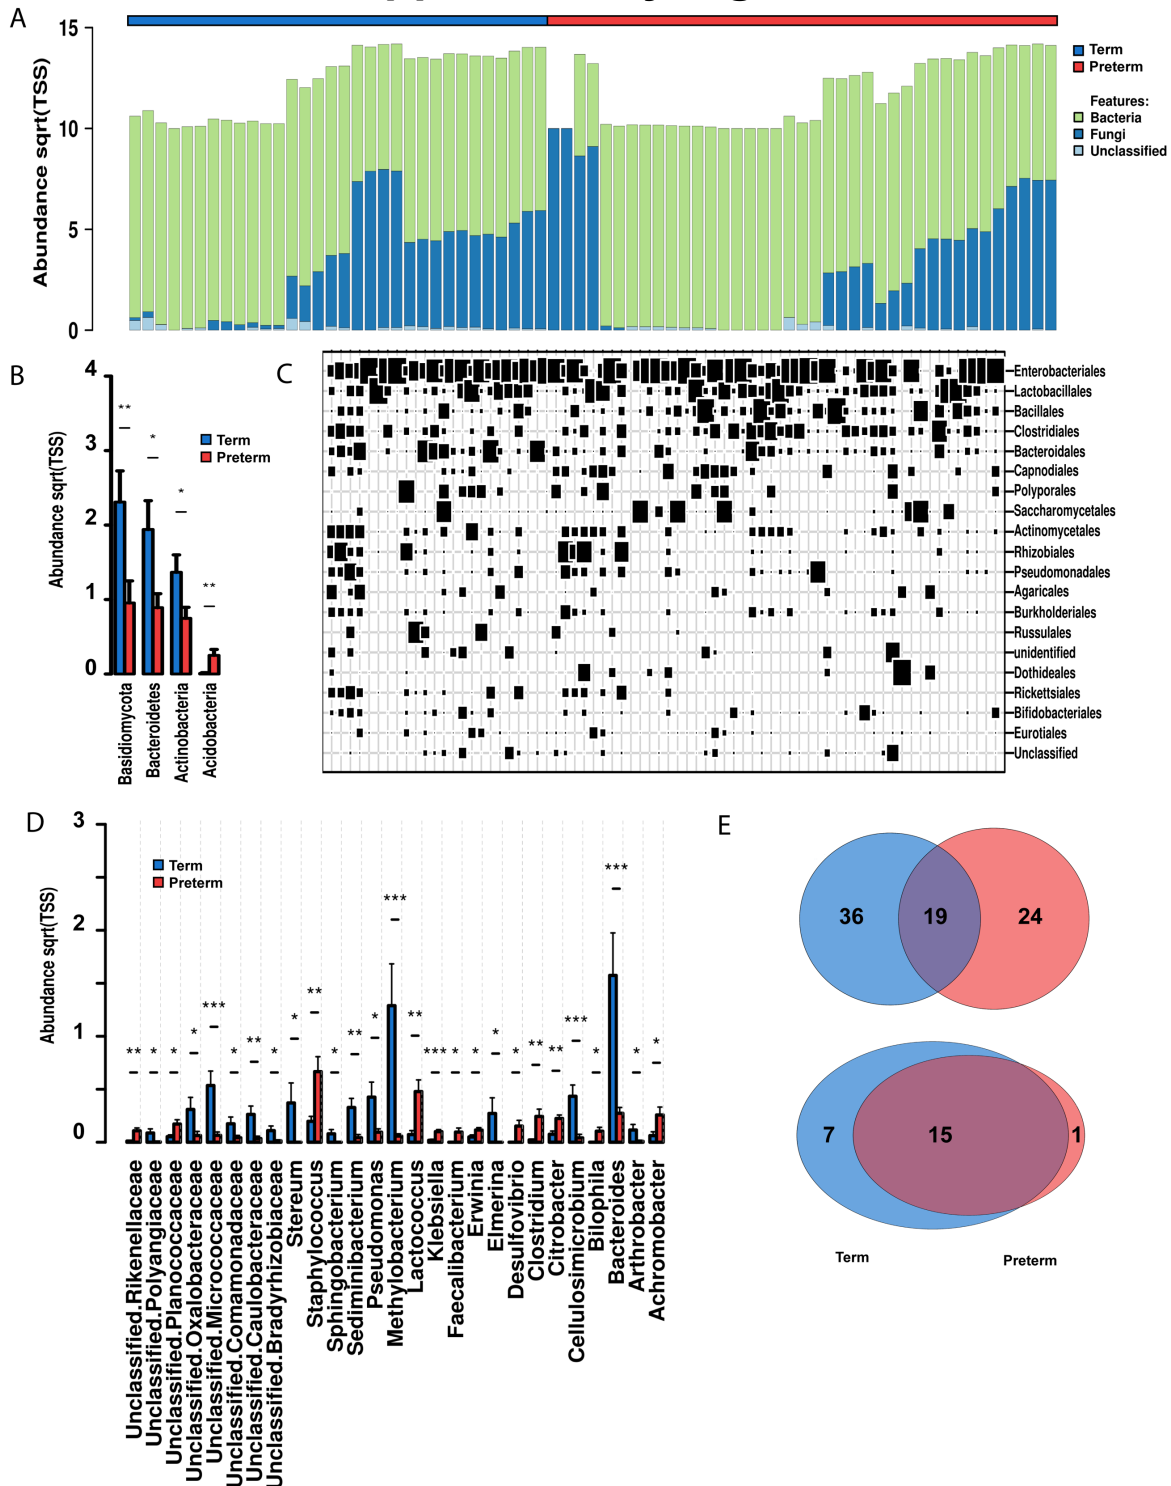

**Supplemental Fig 1.** Fungal and bacterial communities increase in complexity with advancing gestational age at birth. **A** Superkingdom (interkingdom) relative abundance. Bacteria are displayed in green and fungi are displayed in blue. **B** Distribution of key taxa at the phylum level. Sqrt(TSS), square root total sum normalization (Hellinger transformation). **C** Twenty most abundant interkingdom taxa at the order level. **D** Distribution of key taxa at the genus level. **E** Core interkingdom OTUs and unique phyla between preterm and term-born infants. Data are median  $\pm$  IQR (n=71). Preterm samples are displayed in red and term-born samples in blue. For both (**A**, **D**) ANOVA, Bonferroni, \*  $p < 0.05$ , \*\*  $p < 0.01$ , \*\*\*  $p < 0.001$ .

## Supplementary Figure 2

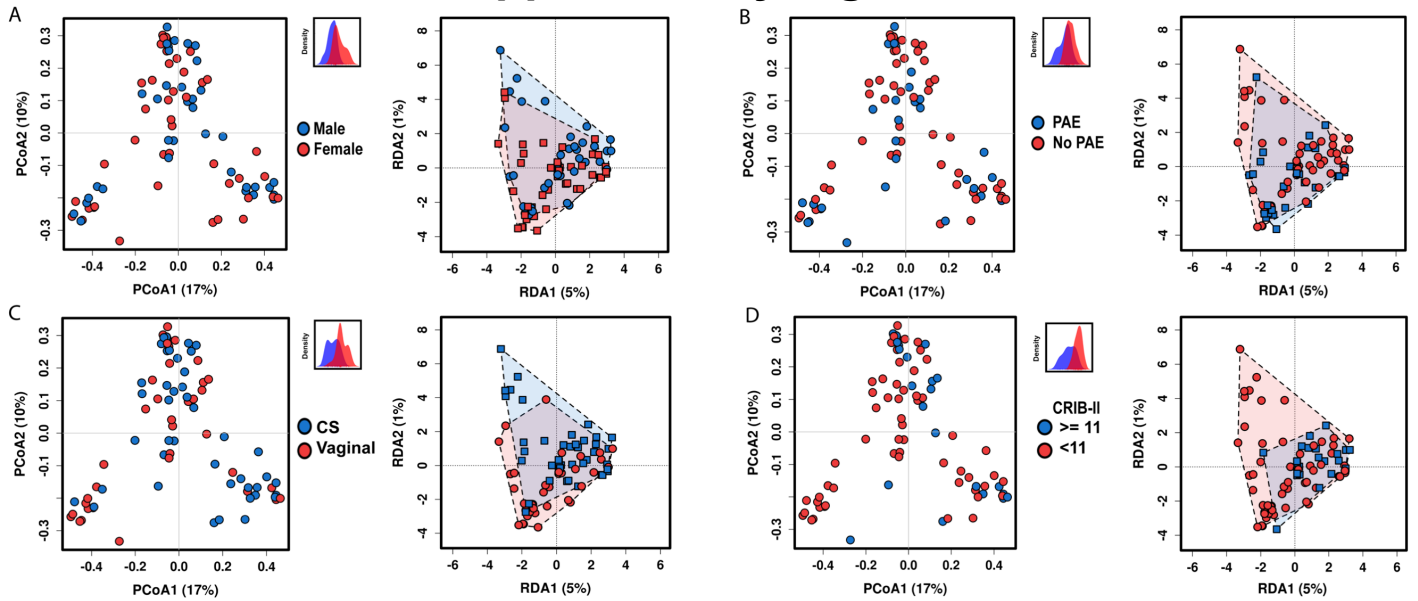

**Supplemental Fig. 2.** Interkingdom community structure is not determined by mode of delivery, prenatal antibiotic exposure, host sex or illness severity.

**A** Principal coordinate analysis (PCoA) of Bray-Curtis dissimilarity matrices showing host sex does not significantly alter community structure, PERMANOVA  $R^2=0.00977$   $p=0.749$ . Redundancy analysis (RDA), variance =4.21  $f=0.90$   $p=0.710$ . The subset displays a discriminant analysis of principal components.

**B** Prenatal antibiotic exposure (PAE) does not significantly alter community structure, PCoA of Bray-Curtis dissimilarity matrices PERMANOVA  $R^2=0.0101$   $p=0.699$ . RDA variance =4.24  $f=0.91$   $p=0.691$ .

**C** Mode of delivery does not significantly alter community structure, PCoA of Bray-Curtis dissimilarity matrices PERMANOVA  $R^2=0.0216$   $p=0.0526$ . RDA variance =5.34  $f=1.14$   $p=0.169$ .

**D** Clinical illness severity does not significantly alter community structure, PCoA of Bray-Curtis dissimilarity matrices PERMANOVA  $R^2=0.00718$   $p=0.964$ . RDA variance =3.16  $f=0.68$   $p=0.997$ . CRIB-II, Critical Risk Index for Babies II.

Gestational age (data not shown), RDA variance =17.14  $f=3.67$   $p=0.001$ .

For all analyses  $n = 71$ .

## Supplementary Figure 3

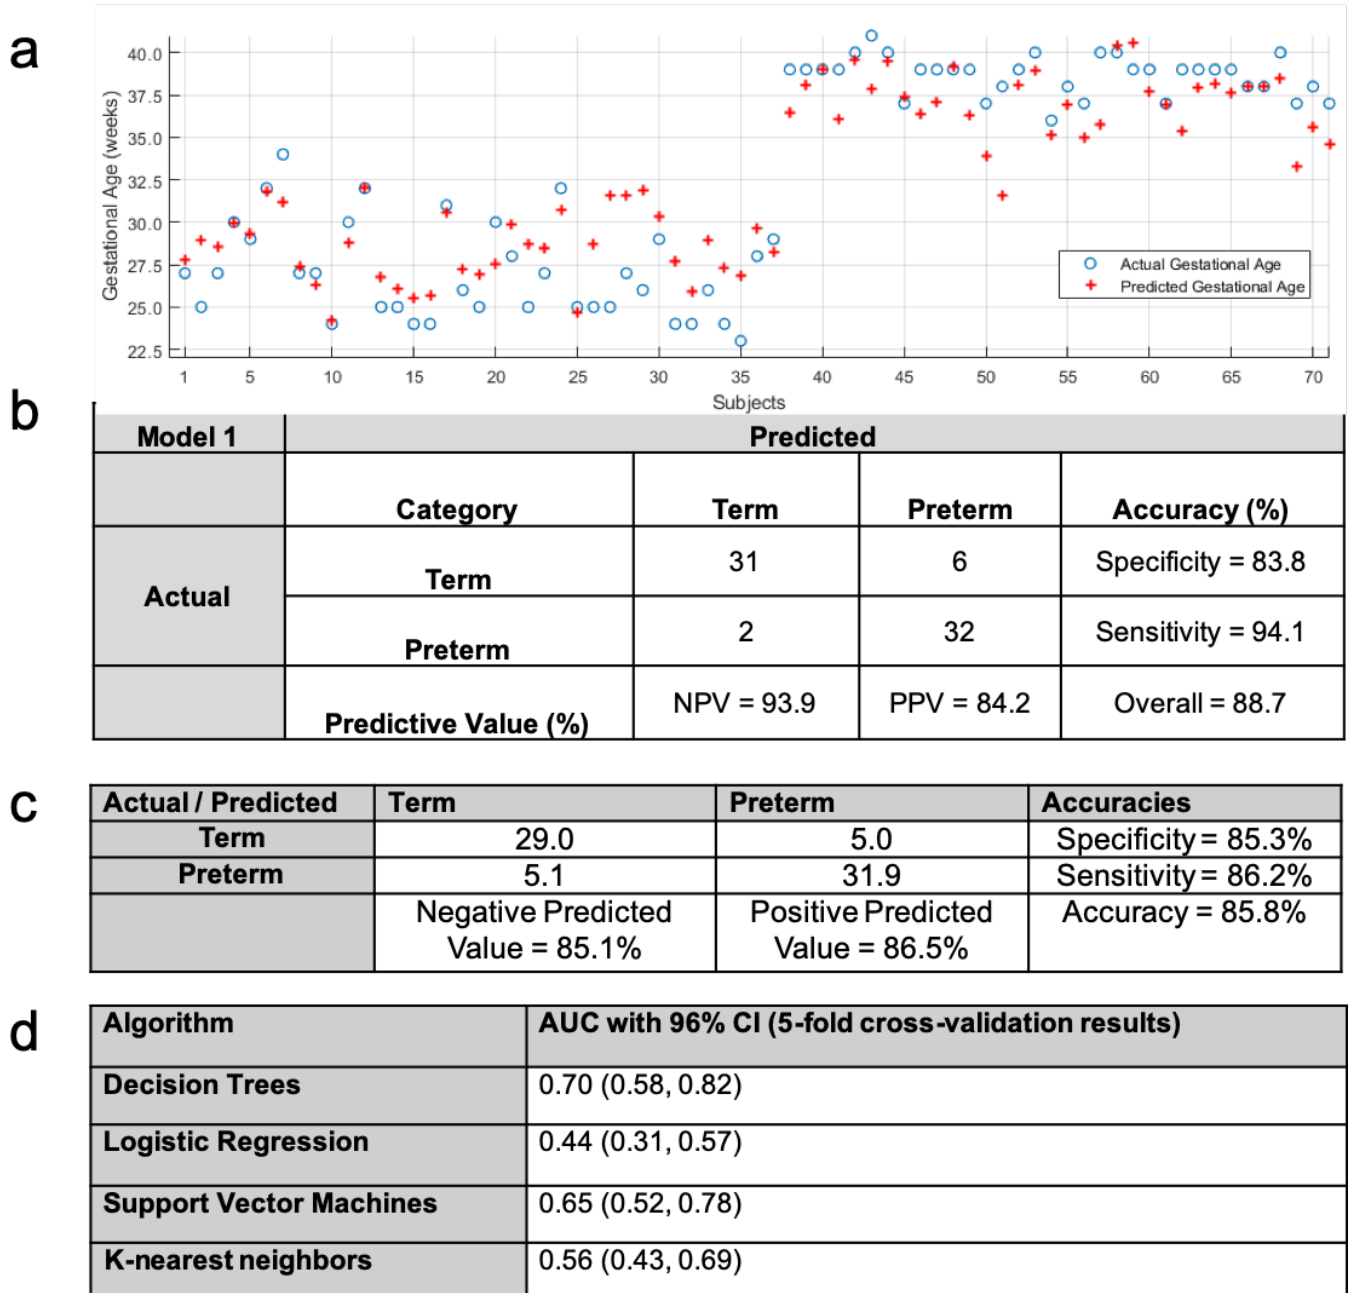

**Supplemental Fig. 3.** Machine learning models to predict preterm versus term gestational age using microbial taxa. **A** Utilizing 51 fungal and 209 bacterial taxa that were identified at least twice in the dataset, we utilized LASSO with 5-fold cross validation to identify significant predictors, leading to the identification of 9 fungal and 34 bacterial taxa as predictors of gestational age yielding an  $R^2$  of 0.85 and an adjusted  $R^2$  of 0.62.

**B** Confusion matrix from a support vector machine model utilizing these key microbial taxa.

**C** Confusion matrix from the final genera-level random forest machine learning model.

**D** Comparison of other machine learning models with less accuracy than random forest.

## Supplementary Figure 4

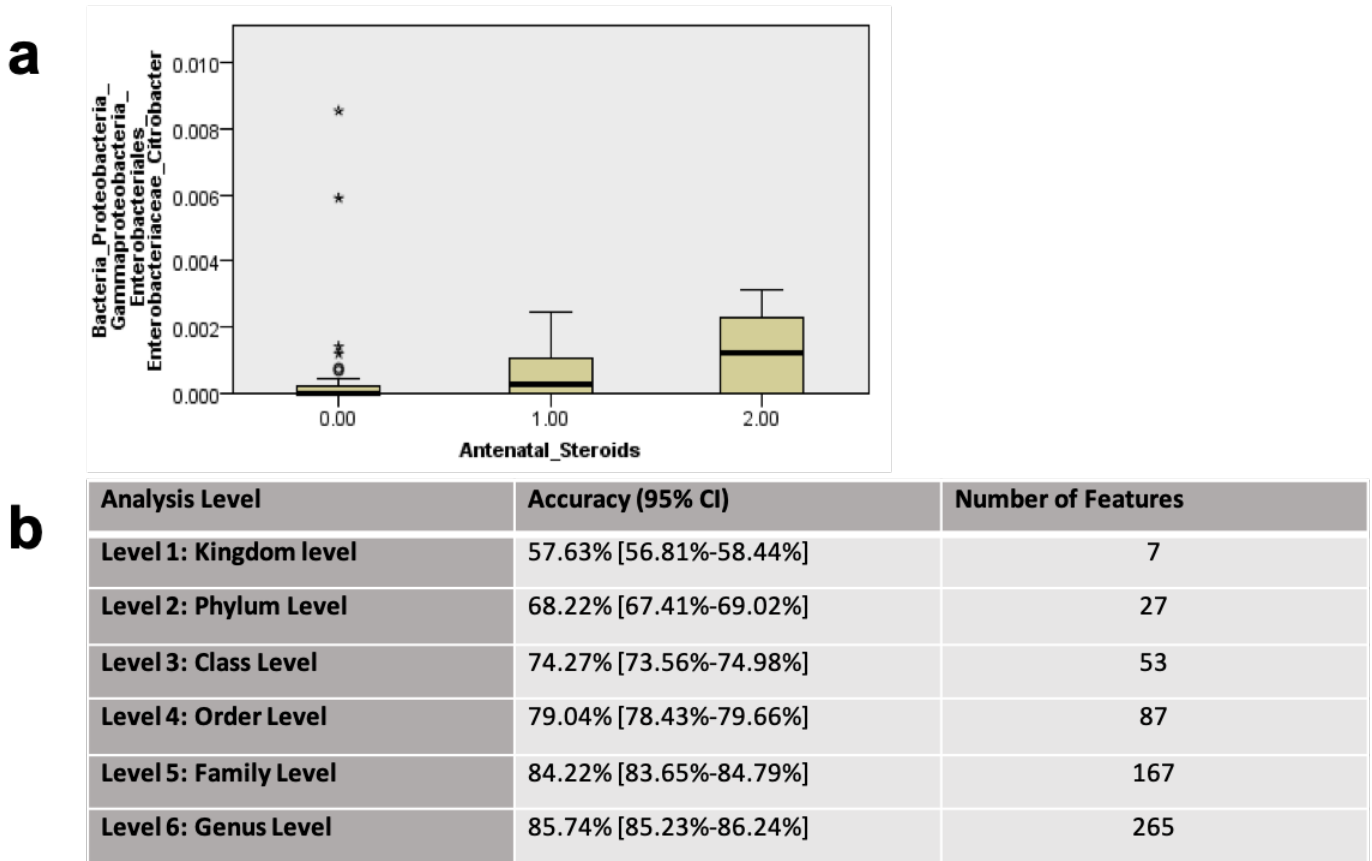

**Supplemental Fig. 4.** Machine learning models of interkingdom community importance.

**A** Box plot showing the alteration of 7 of the 10 most important bacterial taxa by the use of antenatal steroids as quantified by independent sample Kruskal-Wallis tests.

**B** Confusion matrix from a random forest classifier model for each phylogenetic level.

Significant predictors are as follows:

| Variable:                                                                                            | Importance (%) |
|------------------------------------------------------------------------------------------------------|----------------|
| Bacteria, Bacteroidetes, Bacteroidia, Bacteroidales, Rikenellaceae, undefined                        | 4.49062131     |
| Maternal Age                                                                                         | 3.07380941     |
| Bacteria, Bacteroidetes, Bacteroidia, Bacteroidales, Porphyromonadaceae, Parabacteroides             | 3.03080201     |
| Bacteria, Proteobacteria, Gammaproteobacteria, Enterobacteriales, Enterobacteriaceae, Citrobacter    | 2.62700202     |
| Bacteria, Bacteroidetes, Bacteroidia, Bacteroidales, Bacteroidaceae, Bacteroides                     | 2.59241299     |
| Bacteria, Proteobacteria, Deltaproteobacteria, Desulfovibrionales, Desulfovibrionaceae, Desulfovibri | 2.55982523     |
| Bacteria, Proteobacteria, Alphaproteobacteria, Rickettsiales, mitochondria, Other                    | 2.51801403     |
| Bacteria, Firmicutes, Bacilli, Lactobacillales, Streptococcaceae, Lactococcus                        | 2.39478017     |
| Maternal BMI                                                                                         | 2.3822576      |
| Bacteria, Firmicutes, Clostridia, Clostridiales, Ruminococcaceae, Oscillospira                       | 2.24234257     |

## Supplementary Figure 5

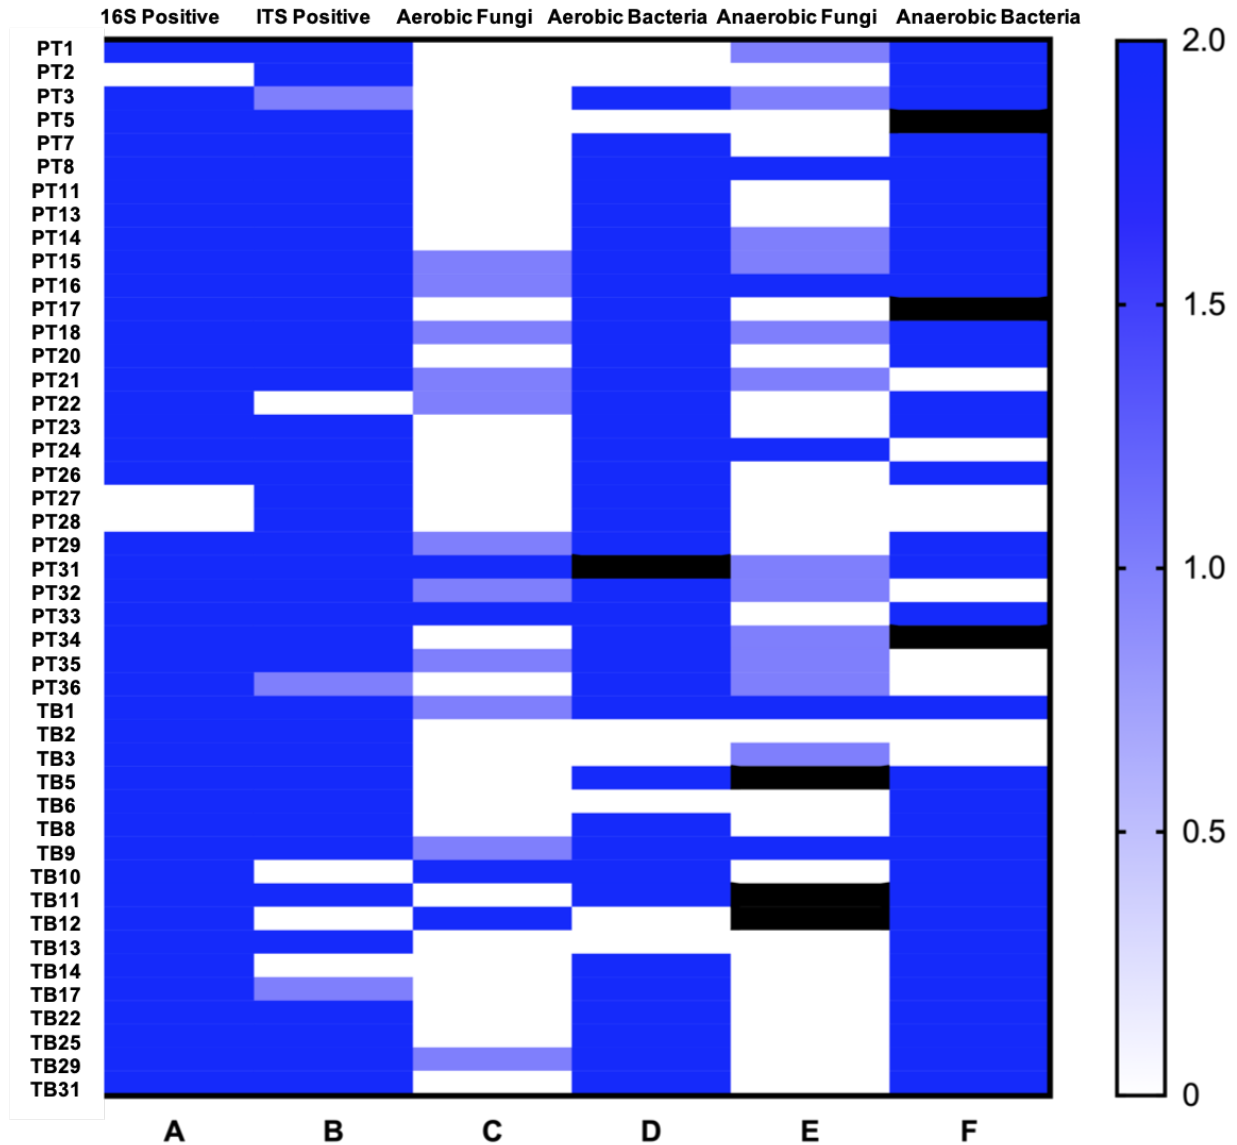

**Supplemental Figure 5.** Live fungi and bacteria are present by culture-based techniques.

**A** 16S rRNA (bacteria and archaea).

**B** ITS rDNA (fungi).

**C** Aerobic yeast-extract-peptone-dextrose (YPD) with chloramphenicol broth (aerobic fungi).

**D** Aerobic brain heart infusion (BHI) with fluconazole broth (aerobic bacteria).

**E** Anaerobic YPD with chloramphenicol broth (anaerobic fungi).

**F** Anaerobic BHI with fluconazole (anaerobic bacteria).

2 = strongly positive, 1 = weakly positive, 0 = undetected. Black cells represent quantity not sufficient.

(n = 46; PT, preterm n = 30; TB, term-born n = 17)
